# Supplementary material
Source: publisher figshare collection journal article supplement (https://acs.figshare.com/ndownloader/files/4487803)
Supplement: Supplementary file 1 [file 4487803]

## Supporting Information

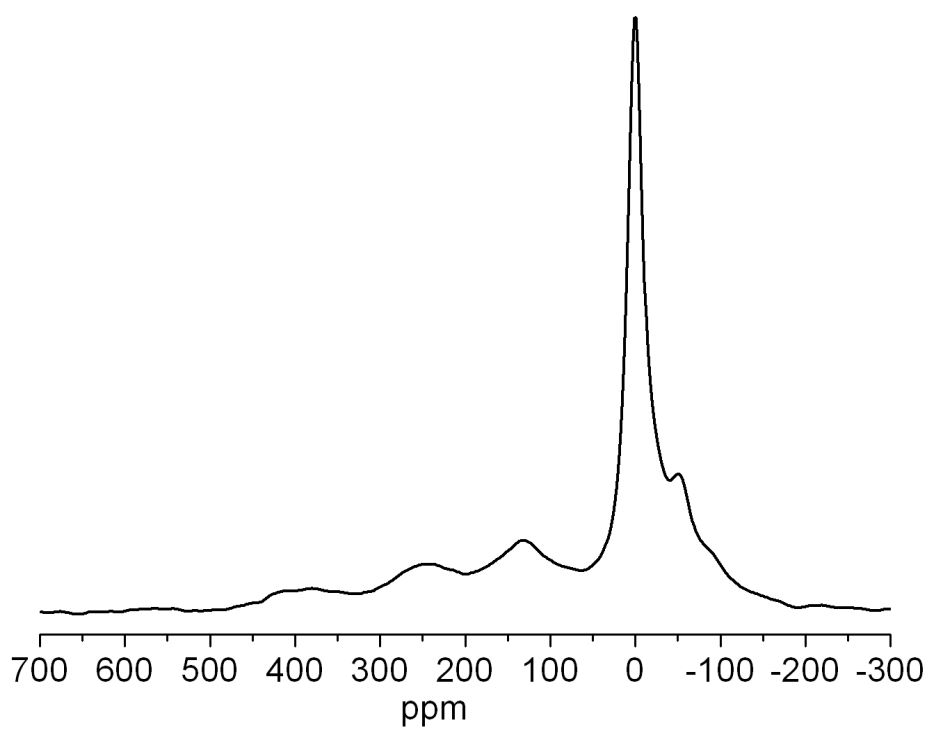

Figure S1. A  $^6\text{Li}$  MAS NMR spectrum of a  **$^{90}\text{Co}$**  pristine sample made with natural abundance  $\text{LiOH}\cdot\text{H}_2\text{O}$ , acquired at 4.7 T at a spinning speed of 38 kHz.

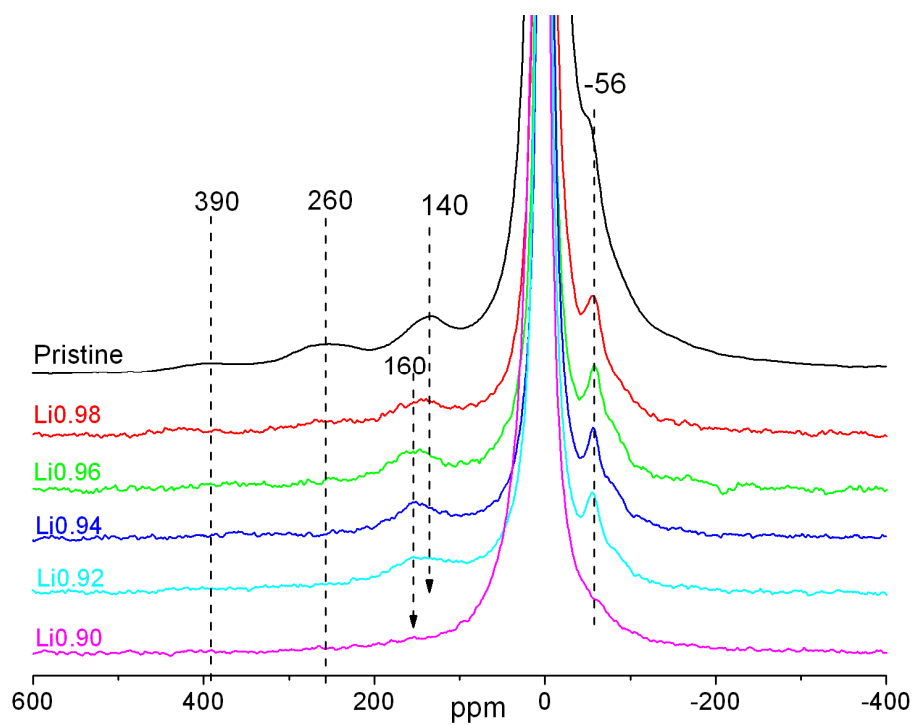

Figure S2. A zoom of the  ${}^6\text{Li}$  MAS NMR spectra, normalized based on the acquisition number and sample mass, of pristine and partially charged  $\text{Li}[\text{Ni}_{0.02}\text{Mn}_{0.02}\text{Co}_{0.96}]\text{O}_2$  (**96Co**) samples, labeled as  $\text{Li}_x$  stand for  $\text{Li}_x[\text{Ni}_{0.02}\text{Mn}_{0.02}\text{Co}_{0.96}]\text{O}_2$  ( $1.00 \geq x \geq 0.90$ ).
